# Supplementary material for: Metabolic Profile of the Cellulolytic Industrial Actinomycete Thermobifida fusca
Source: MDPI journal article supplement (doi:10.3390/metabo7040057), 2017-11-11
Supplement: s1 [file s1]

## Pathway Distribution of Compounds Isolated from *T. fusca* grown on Cellobiose Media

| KEGG Pathway ID                              | Pathway                                    | Total | Detected | %     | Compounds                                                                                     |
|----------------------------------------------|--------------------------------------------|-------|----------|-------|-----------------------------------------------------------------------------------------------|
| <b>AMINO ACIDS METABOLISM</b>                |                                            |       |          |       |                                                                                               |
| tfu00250                                     | Alanine, aspartate and glutamate metabo    | 24    | 5        | 20.8% | C00041 C03794 C00169 C00025 C00122<br>C05931 C00122 C00791 C00437 C03415 C00062 C00763 C00555 |
| tfu00330                                     | Arginine and proline metabolism            | 82    | 15       | 18.3% | C00048 C00169 C00624 C00148 C01250 C00025 C00431                                              |
| tfu00300                                     | Lysine biosynthesis                        | 32    | 5        | 15.6% | C03871 C04421 C12986 C12987 C00449                                                            |
| tfu00400                                     | Phenylalanine, tyrosine and tryptophan b   | 27    | 4        | 14.8% | C00296 C00166 C00108 C00078                                                                   |
| tfu00270                                     | Cysteine and methionine metabolism         | 56    | 8        | 14.3% | C02989 C00170 C00109 C00041 C01005 C00021 C01180 C00073                                       |
| tfu00290                                     | Valine, leucine and isoleucine biosynthesi | 28    | 4        | 14.3% | C00407 C00123 C00109 C00183                                                                   |
| tfu00360                                     | Phenylalanine metabolism                   | 46    | 6        | 13.0% | C00166 C02137 C05853 C00811 C00122 C02505                                                     |
| tfu00310                                     | Lysine degradation                         | 47    | 5        | 10.6% | C03656 C03955 C00408 C00449 C00431                                                            |
| tfu00260                                     | Glycine, serine and threonine metabolism   | 49    | 5        | 10.2% | C00114 C00109 C00048 C01005 C00078                                                            |
| tfu00280                                     | Valine, leucine and isoleucine degradatio  | 41    | 4        | 9.8%  | C00164 C00407 C00183 C00123                                                                   |
| tfu00380                                     | Tryptophan metabolism                      | 81    | 7        | 8.6%  | C05659 C00078 C05660 C00108 C02700 C05837 C00643                                              |
| tfu00350                                     | Tyrosine metabolism                        | 76    | 5        | 6.6%  | C00164 C06199 C00483 C00122 C17938                                                            |
| tfu00340                                     | Histidine metabolism                       | 44    | 2        | 4.5%  | C00025 C01152                                                                                 |
| <b>CARBOHYDRATES METABOLISM</b>              |                                            |       |          |       |                                                                                               |
| tfu00640                                     | Propanoate metabolism                      | 36    | 8        | 22.2% | C02876 C00109 C00183 C00099 C00207 C05985 C00894 C00164                                       |
| tfu00660                                     | C5-Branched dibasic acid metabolism        | 32    | 4        | 12.5% | C00025 C02876 C00048 C00109                                                                   |
| tfu00650                                     | Butanoate metabolism                       | 40    | 4        | 10.0% | C00122 C01384 C00025 C00164                                                                   |
| tfu00020                                     | Citrate cycle (TCA cycle)                  | 20    | 2        | 10.0% | C00122 C05379                                                                                 |
| tfu00520                                     | Amino sugar and nucleotide sugar metabo    | 87    | 7        | 8.0%  | C00140 C00128 C00043 C00203 C00270 C00029 C00645                                              |
| tfu00052                                     | Galactose metabolism                       | 41    | 3        | 7.3%  | C00029 C00116 C01286                                                                          |
| tfu00630                                     | Glyoxylate and dicarboxylate metabolism    | 44    | 3        | 6.8%  | C00048 C02123 C00975                                                                          |
| tfu00030                                     | Pentose phosphate pathway                  | 32    | 2        | 6.3%  | C01236 C01151                                                                                 |
| tfu00620                                     | Pyruvate metabolism                        | 32    | 2        | 6.3%  | C03981 C03248                                                                                 |
| tfu00500                                     | Starch and sucrose metabolism              | 50    | 3        | 6.0%  | C00029 C00689 C02591                                                                          |
| tfu00053                                     | Ascorbate and aldarate metabolism          | 47    | 1        | 2.1%  | C00029                                                                                        |
| tfu00040                                     | Pentose and glucuronate interconversion:   | 53    | 1        | 1.9%  | C00029                                                                                        |
| <b>BIOSYNTHESIS OF SECONDARY METABOLITES</b> |                                            |       |          |       |                                                                                               |
| tfu00900                                     | Terpenoid backbone biosynthesis            | 33    | 2        | 6.1%  | C16521 C00418                                                                                 |
| tfu00401                                     | Novobiocin biosynthesis                    | 37    | 2        | 5.4%  | C12469 C00148                                                                                 |
| tfu00521                                     | Streptomycin biosynthesis                  | 24    | 1        | 4.2%  | C01221                                                                                        |
