# Supplementary material for: Metabolic Profile of the Cellulolytic Industrial Actinomycete Thermobifida fusca
Source: MDPI journal article supplement (doi:10.3390/metabo7040057), 2017-11-11
Supplement: s1 [file s1]

## Pathway Distribution of Compounds Isolated from *T. fusca* grown on Avicel Media

| KEGG Pathway ID                              | Pathway                                             | Total | Detected | %     | Compounds                                        |
|----------------------------------------------|-----------------------------------------------------|-------|----------|-------|--------------------------------------------------|
| <b>AMINO ACIDS METABOLISM</b>                |                                                     |       |          |       |                                                  |
|                                              |                                                     |       |          |       | C04421 C03340 C00449 C00049 C12986 C00047 C03871 |
| tfu00300                                     | Lysine biosynthesis                                 | 32    | 9        | 28.1% | C00322 C01251                                    |
| tfu00250                                     | Alanine, aspartate and glutamate metabolism         | 24    | 6        | 25.0% | C00169 C00152 C00049 C00940 C00025 C00122        |
|                                              |                                                     |       |          |       | C03440 C00049 C00122 C00624 C01043 C00025 C18174 |
| tfu00330                                     | Arginine and proline metabolism                     | 82    | 14       | 17.1% | C00169 C00327 C00763 C00148 C01250 C00431 C03415 |
| tfu00310                                     | Lysine degradation                                  | 47    | 7        | 14.9% | C00739 C03656 C03955 C00431 C00322 C00047 C00449 |
| tfu00290                                     | Valine, leucine and isoleucine biosynthesis         | 28    | 4        | 14.3% | C00407 C00188 C00123 C00183                      |
| tfu00360                                     | Phenylalanine metabolism                            | 46    | 6        | 13.0% | C00811 C05853 C00122 C00166 C02137 C02505        |
| tfu00260                                     | Glycine, serine and threonine metabolism            | 49    | 6        | 12.2% | C00576 C00049 C03283 C00188 C00078 C06231        |
| tfu00280                                     | Valine, leucine and isoleucine degradation          | 41    | 4        | 9.8%  | C00183 C00407 C00068 C00123                      |
| tfu00340                                     | Histidine metabolism                                | 44    | 4        | 9.1%  | C00025 C00049 C05575 C05131                      |
| tfu00730                                     | Thiamine metabolism                                 | 26    | 2        | 7.7%  | C04327 C00068                                    |
| tfu00400                                     | Phenylalanine, tyrosine and tryptophan biosynthesis | 27    | 2        | 7.4%  | C00166 C00078                                    |
| tfu00350                                     | Tyrosine metabolism                                 | 76    | 4        | 5.3%  | C00122 C00483 C17938 C01693                      |
| tfu00380                                     | Tryptophan metabolism                               | 81    | 3        | 3.7%  | C00078 C00322 C05837                             |
| tfu00270                                     | Cysteine and methionine metabolism                  | 56    | 2        | 3.6%  | C00049 C00170                                    |
| tfu00450                                     | Selenoamino acid metabolism                         | 30    | 1        | 3.3%  | C05699                                           |
| <b>CARBOHYDRATE METABOLISM</b>               |                                                     |       |          |       |                                                  |
| tfu00640                                     | Propanoate metabolism                               | 36    | 5        | 13.9% | C00183 C00207 C02876 C00894 C05985               |
| tfu00620                                     | Pyruvate metabolism                                 | 32    | 4        | 12.5% | C03981 C00068 C01251 C03248                      |
| tfu00650                                     | Butanoate metabolism                                | 40    | 4        | 10.0% | C00025 C01384 C00122 C00068                      |
| tfu00020                                     | Citrate cycle (TCA cycle)                           | 20    | 2        | 10.0% | C00122 C00068                                    |
| tfu00660                                     | C5-Branched dibasic acid metabolism                 | 32    | 2        | 6.3%  | C00025 C02876                                    |
| tfu00520                                     | Amino sugar and nucleotide sugar metabolism         | 87    | 5        | 5.7%  | C00140 C00645 C00029 C00043 C00203               |
| tfu00052                                     | Galactose metabolism                                | 41    | 2        | 4.9%  | C00029 C00116                                    |
| tfu00040                                     | Pentose and glucuronate interconversions            | 53    | 2        | 3.8%  | C00029 C00085                                    |
| tfu00010                                     | Glycolysis / Gluconeogenesis                        | 31    | 1        | 3.2%  | C00068                                           |
| tfu00030                                     | Pentose phosphate pathway                           | 32    | 1        | 3.1%  | C01151                                           |
| tfu00630                                     | Glyoxylate and dicarboxylate metabolism             | 44    | 1        | 2.3%  | C00975                                           |
| tfu00053                                     | Ascorbate and aldarate metabolism                   | 47    | 1        | 2.1%  | C00029                                           |
| tfu00500                                     | Starch and sucrose metabolism                       | 50    | 1        | 2.0%  | C00029                                           |
| <b>BIOSYNTHESIS OF SECONDARY METABOLITES</b> |                                                     |       |          |       |                                                  |
| tfu00906                                     | Carotenoid biosynthesis                             | 98    | 5        | 5.1%  | C08583 C08585 C08606 C16280 C15892               |
| tfu00900                                     | Terpenoid backbone biosynthesis                     | 33    | 1        | 3.0%  | C16521                                           |
| tfu00401                                     | Novobiocin biosynthesis                             | 37    | 2        | 5.4%  | C12469 C00148                                    |

|          |                                       |      |    |      |                                                  |
|----------|---------------------------------------|------|----|------|--------------------------------------------------|
| tfu01110 | Biosynthesis of secondary metabolites | 1038 | 37 | 3.6% | C00745 C00624 C00483 C00047 C03648 C05837 C01557 |
|          |                                       |      |    |      | C00122 C00188 C00166 C00078 C12469 C17235 C00843 |
|          |                                       |      |    |      | C00253 C00049 C03340 C00008 C00449 C01250 C00025 |
|          |                                       |      |    |      | C16521 C05851 C17232 C10865 C00020 C00183 C00152 |
|          |                                       |      |    |      | C00811 C03219 C06185 C09910 C00148 C00407 C00327 |
|          |                                       |      |    |      | C00123 C00029                                    |
