# Supplementary figures and images for: Metabolic Profile of the Cellulolytic Industrial Actinomycete Thermobifida fusca
Source: MDPI journal article supplement (doi:10.3390/metabo7040057), 2017-11-11

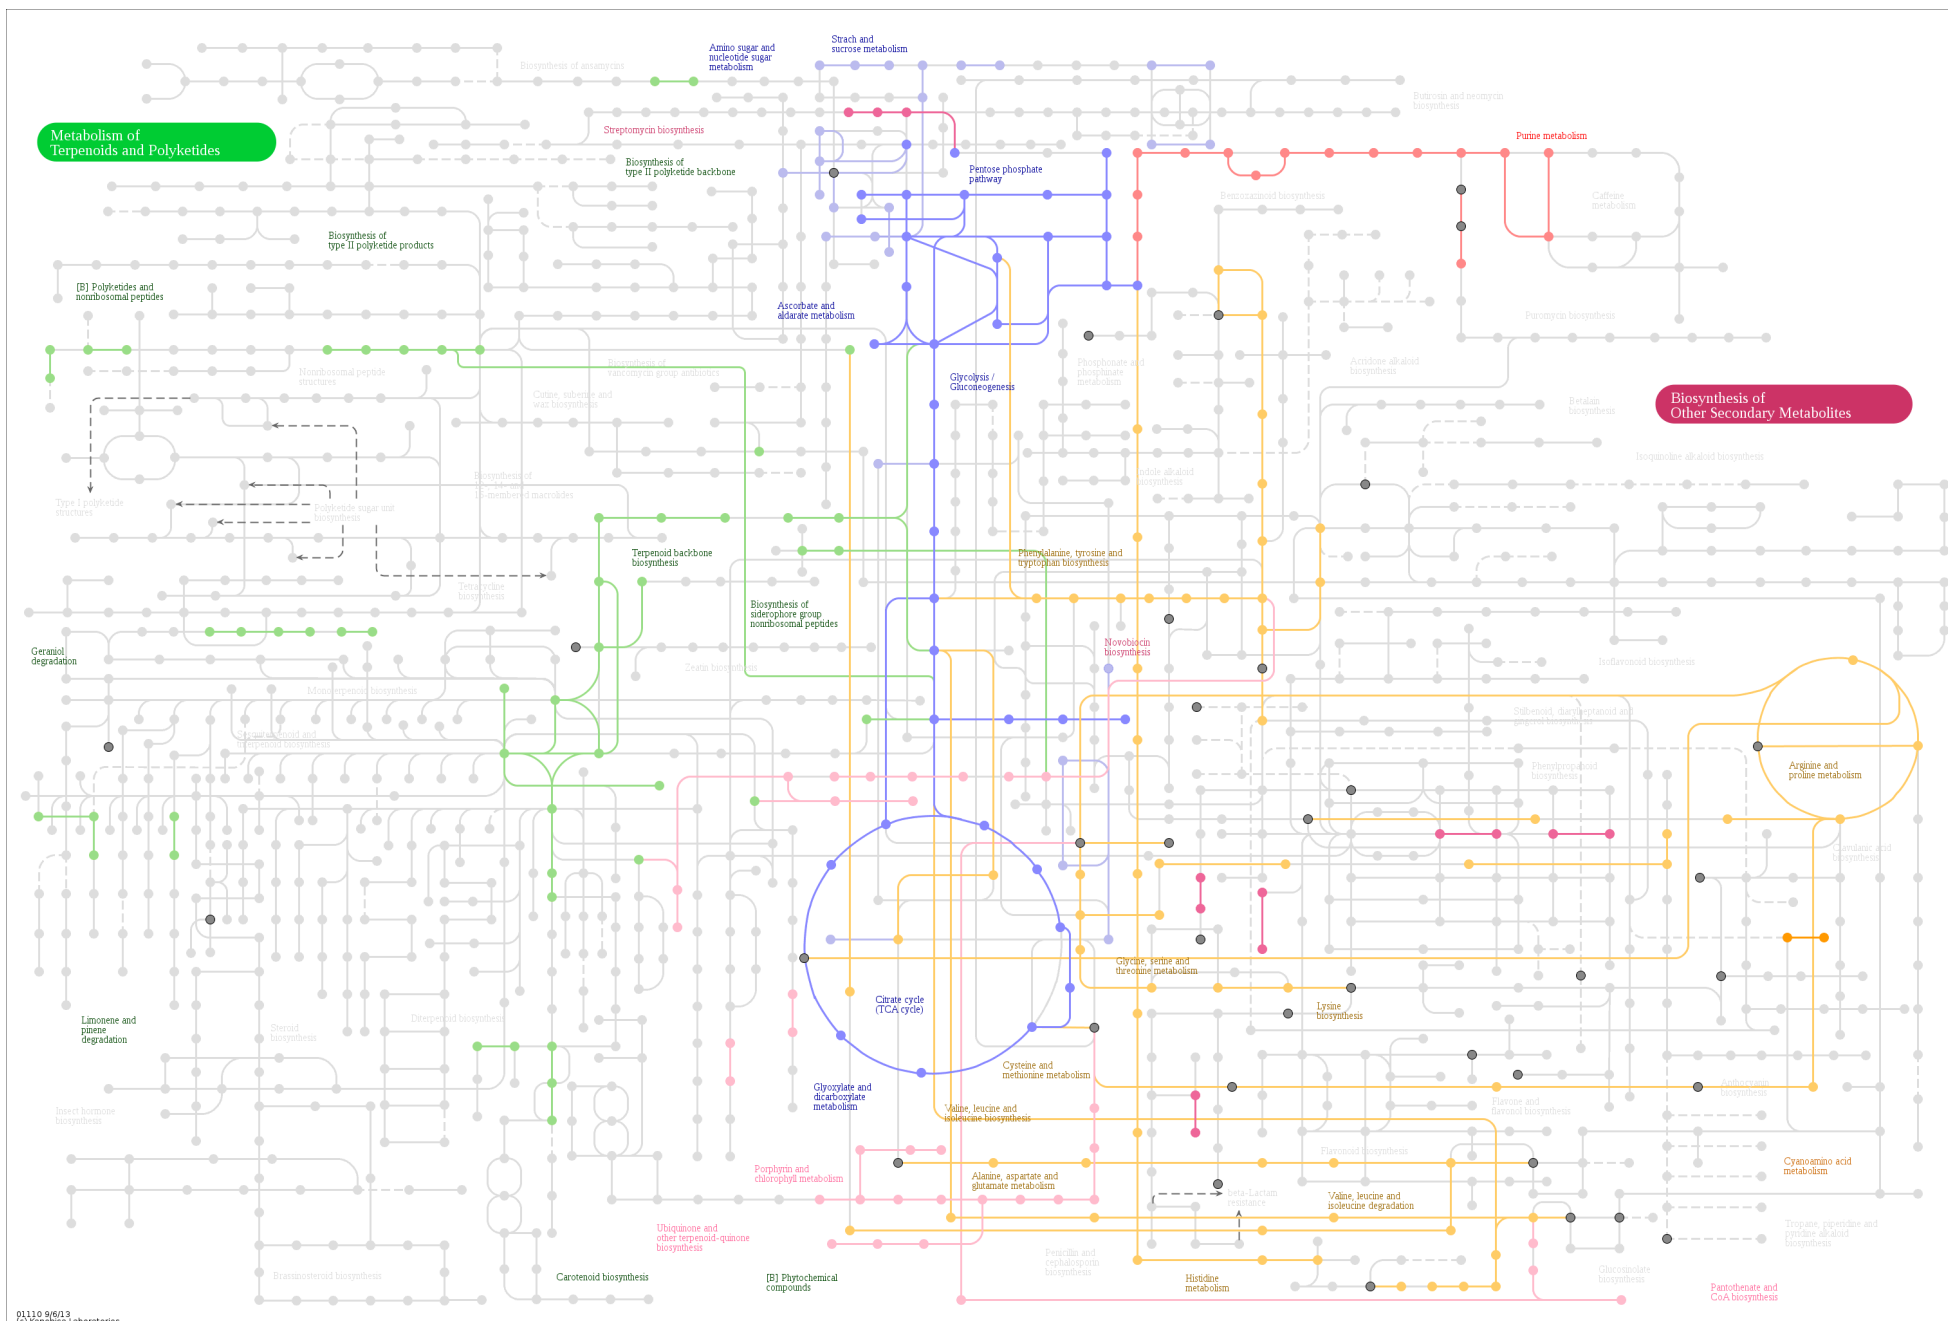

Supplement: s1 [file s1]

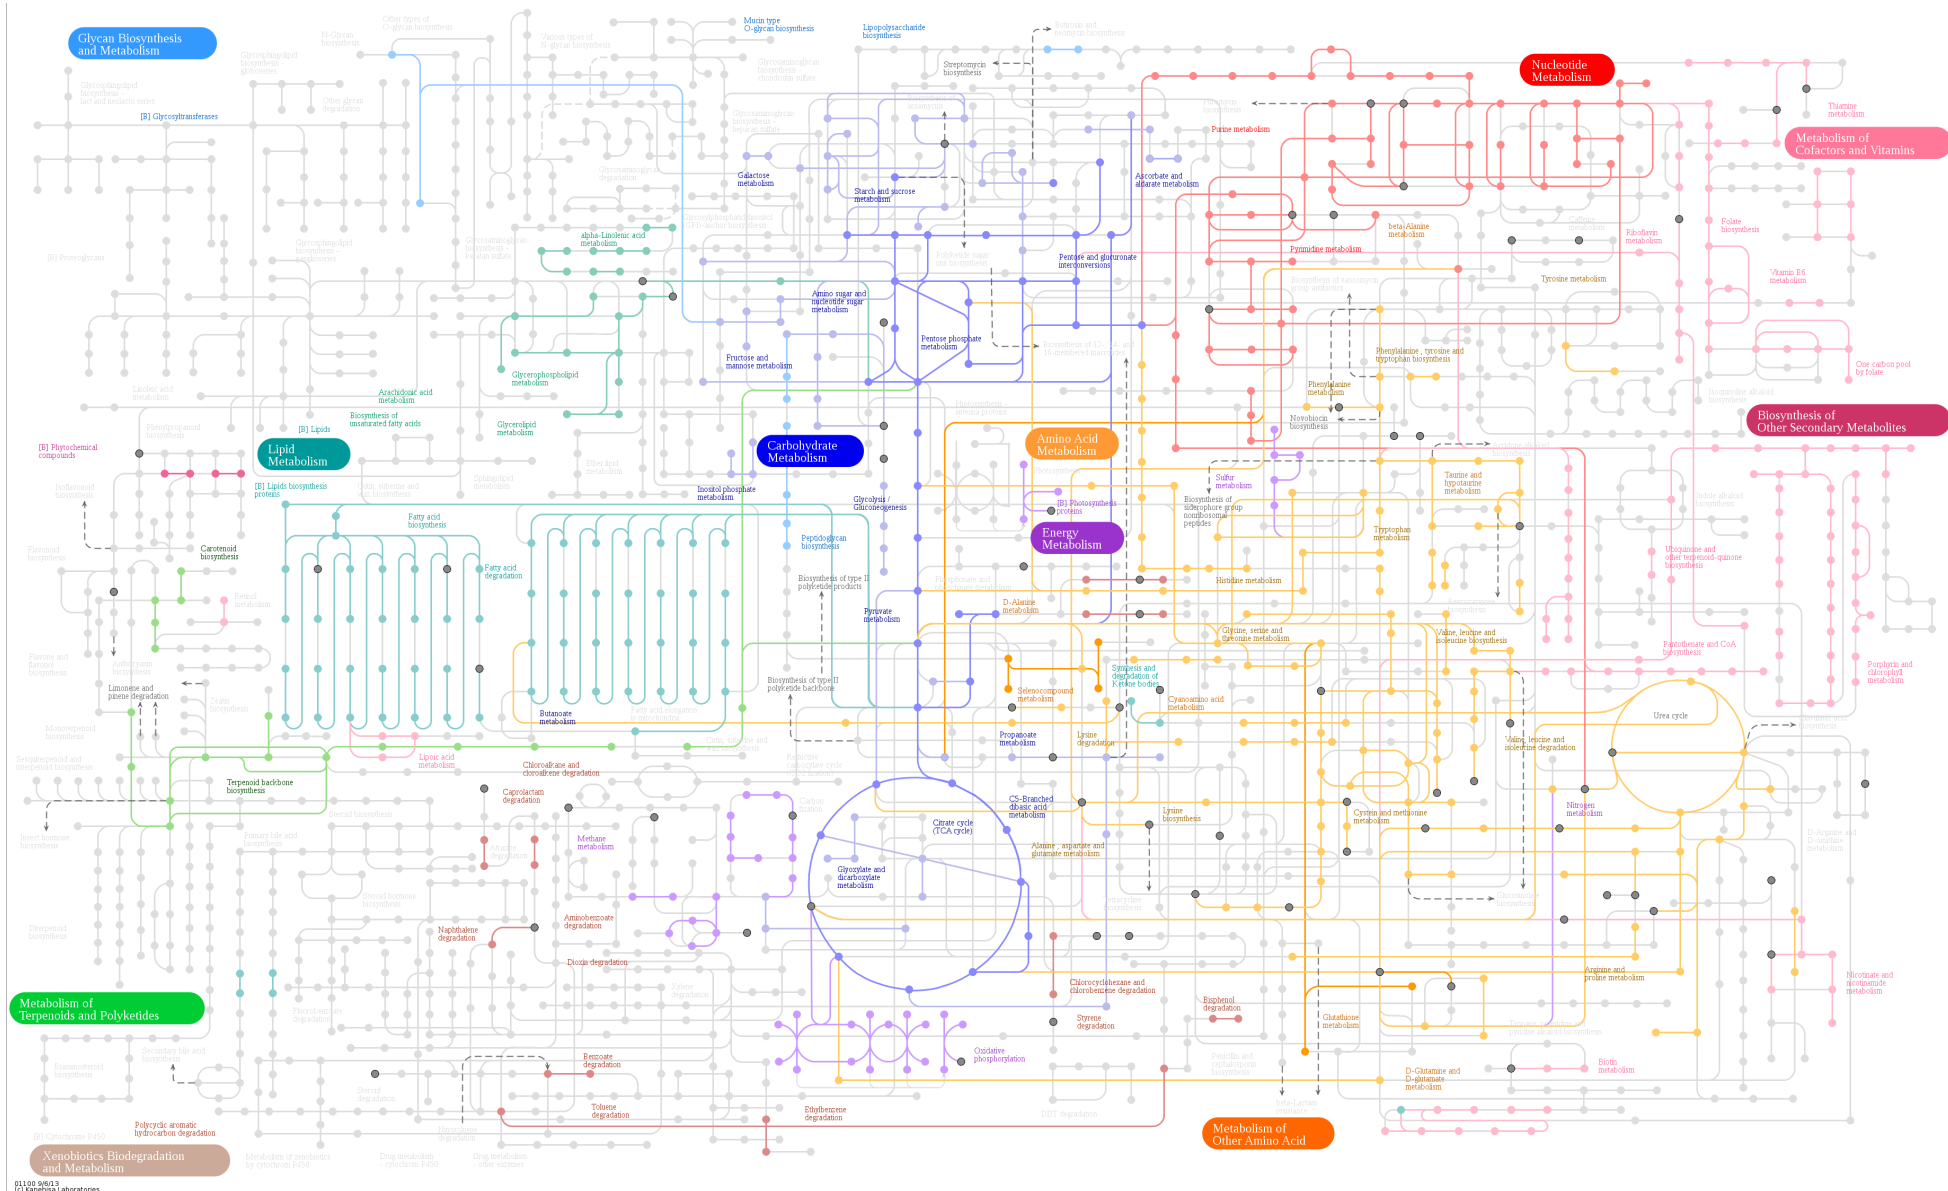

Supplement: s1 [file s1]

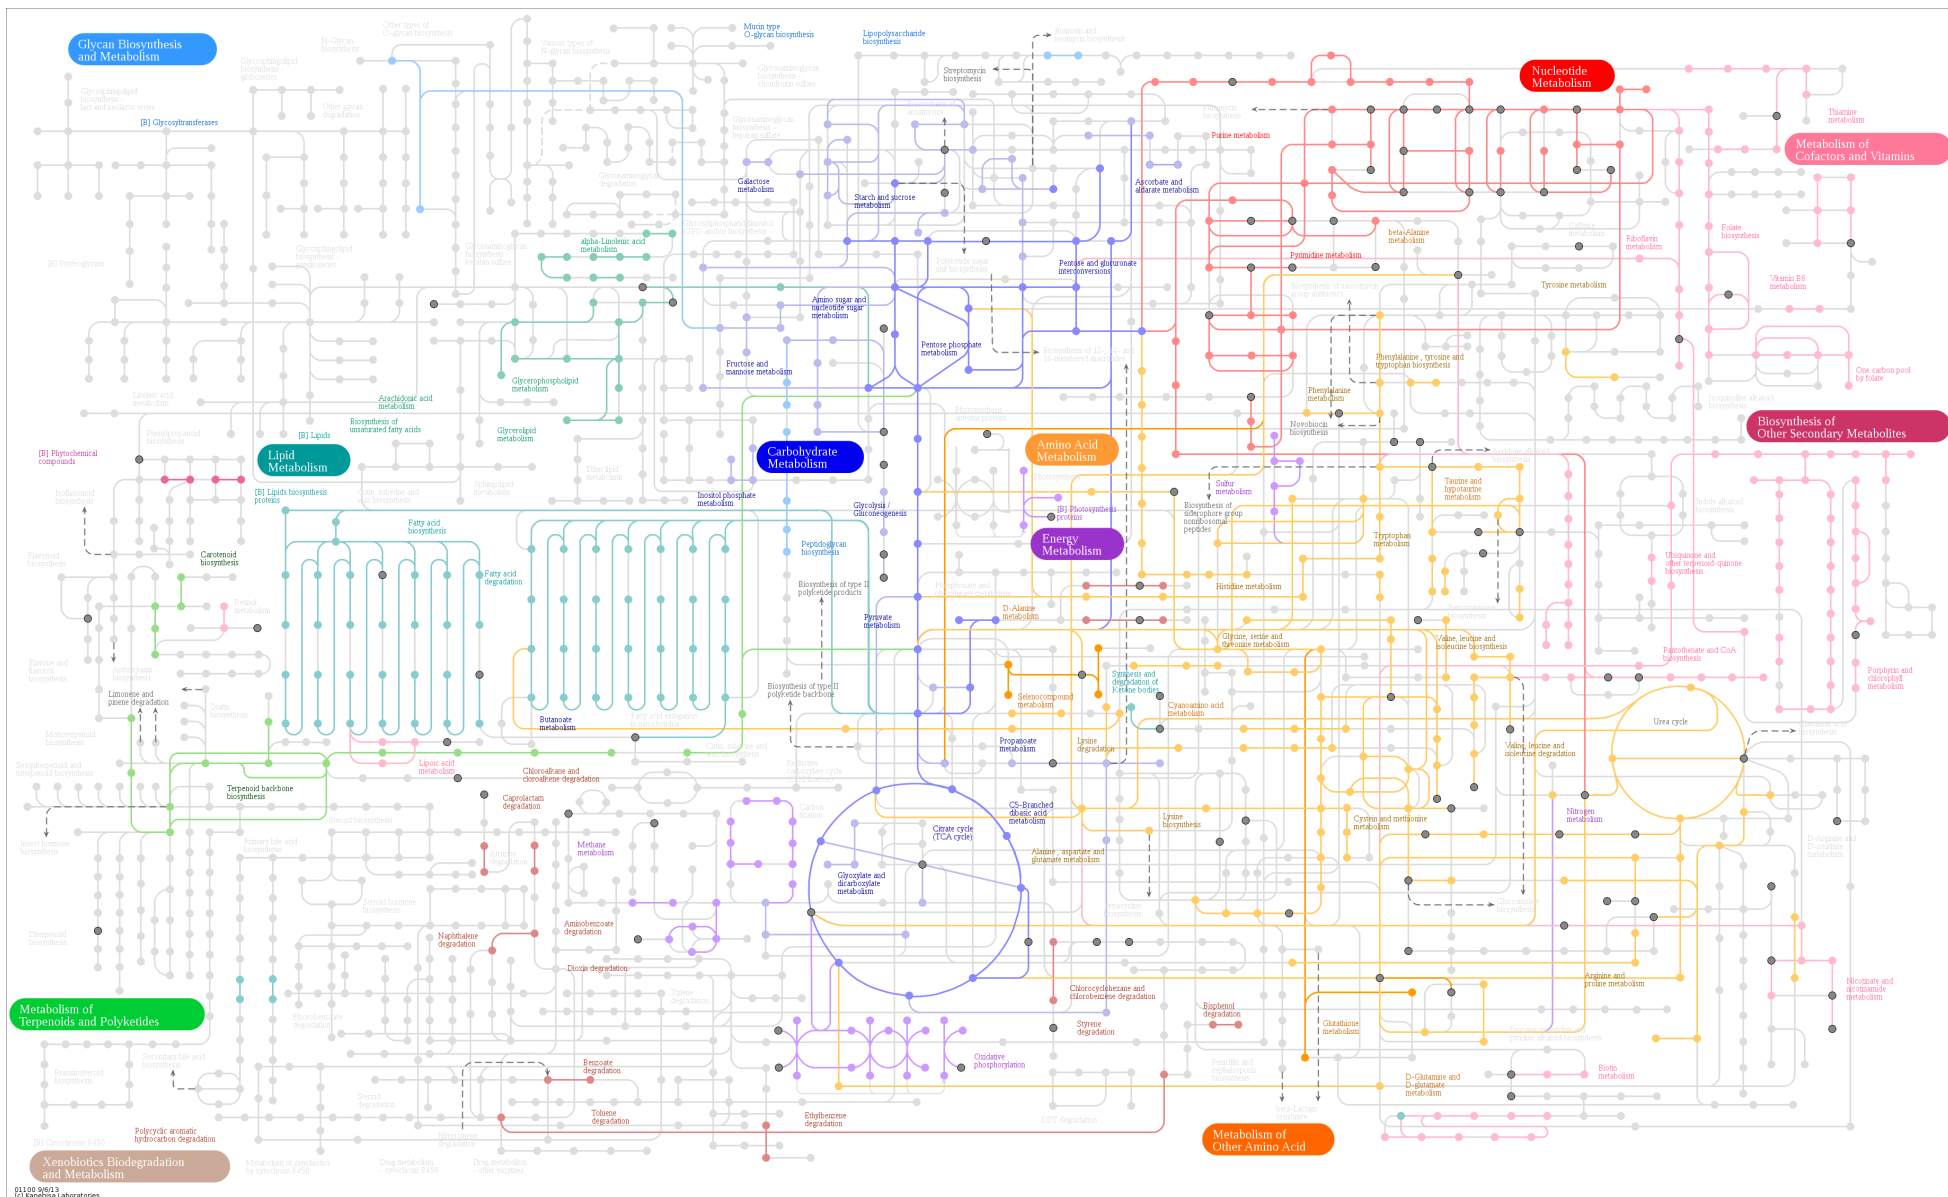

Supplement: s1 [file s1]

## Metabolism of Terpenoids and Polyketides

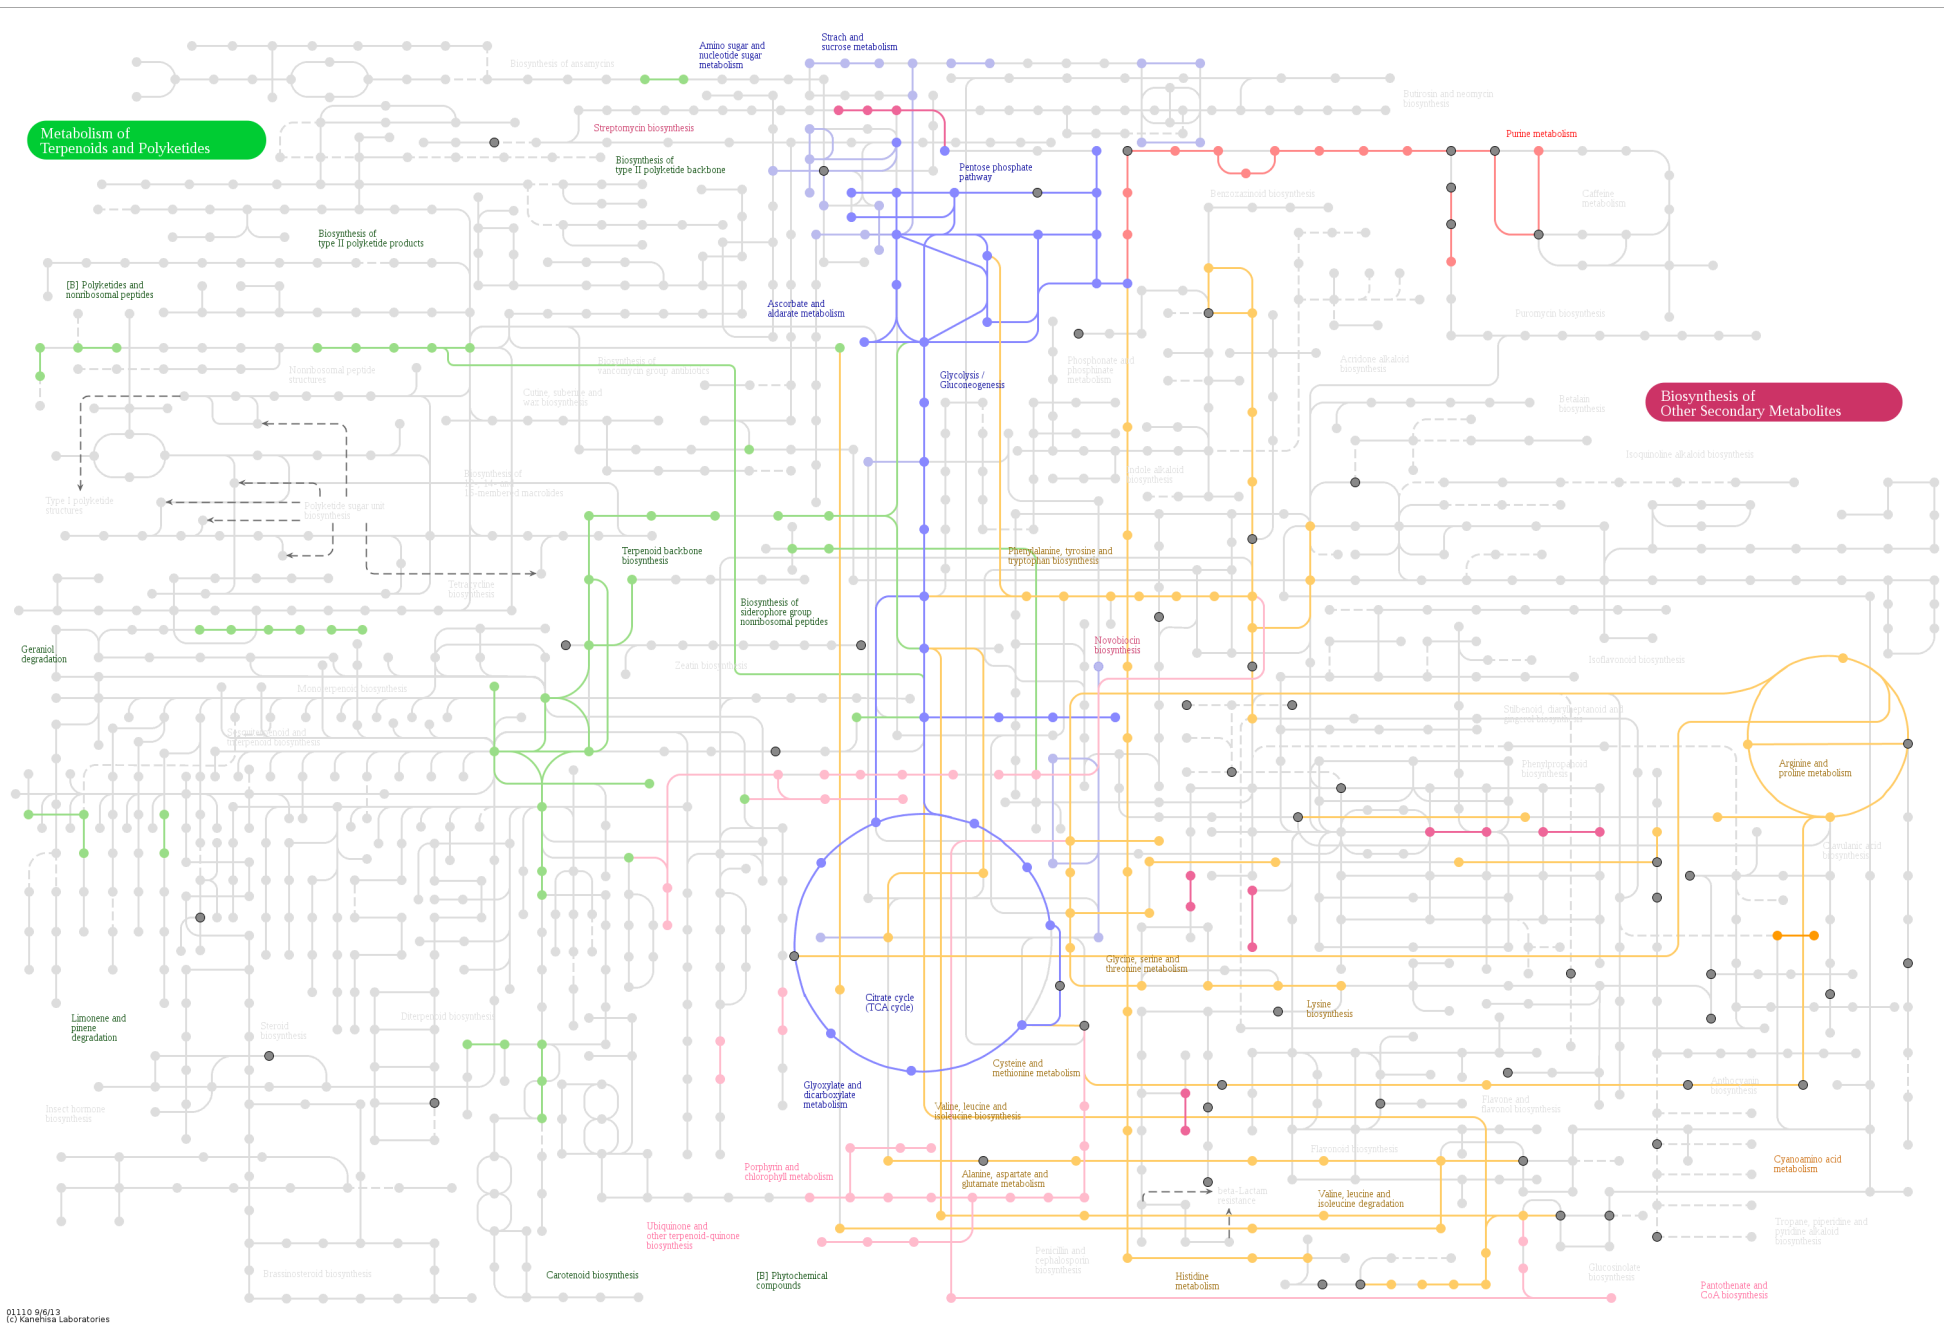

Supplement: s1 [file s1]
